# Supplementary material
Source: HighWire-hosted journal article supplement (https://bmjopen.bmj.com/content/14/12/e084003)
Supplement: inline-supplementary-material-1 [file inline-supplementary-material-1.pdf]

**Supplementary Table 1: The search strategies and information sources used to identify relevant research articles for this systematic review and meta-analysis; 2024**

| Database                | Search strategy/ Terms                                                     | Number of retrieved articles |
|-------------------------|----------------------------------------------------------------------------|------------------------------|
| African Journals Online | (Necrotizing Enterocolitis) AND (Ethiopia)                                 | 22                           |
| PubMed/Medline          | (Necrotizing Enterocolitis) AND (Ethiopia)                                 | 10                           |
| Google scholar          | (Necrotizing Enterocolitis) AND (Ethiopia)                                 | 1910                         |
| Cochrane library        | (Necrotizing Enterocolitis) AND (Ethiopia)                                 | 2                            |
| Others                  | Snow ball searching, repositories, and direct searching by title on Google | 4                            |
| Total                   |                                                                            | 1948                         |
