# Supplementary material
Source: HighWire-hosted journal article supplement (https://bmjopen.bmj.com/content/14/12/e084003)
Supplement: inline-supplementary-material-3 [file inline-supplementary-material-3.pdf]

Supplementary Table 3: Characteristics of the included articles; 2024

| ID                                                                                                                                                                                                                                                                                                                                                                                                                                                                                                                                                                                                                                                                                                                                                                                  | Author                    | Year | Region      | Population        | Study design                  | NEC | NEC Death | Death prevalence |
|-------------------------------------------------------------------------------------------------------------------------------------------------------------------------------------------------------------------------------------------------------------------------------------------------------------------------------------------------------------------------------------------------------------------------------------------------------------------------------------------------------------------------------------------------------------------------------------------------------------------------------------------------------------------------------------------------------------------------------------------------------------------------------------|---------------------------|------|-------------|-------------------|-------------------------------|-----|-----------|------------------|
| 1                                                                                                                                                                                                                                                                                                                                                                                                                                                                                                                                                                                                                                                                                                                                                                                   | Mekonnen et al. (15)      | 2021 | Addis Ababa | Preterm and LBW*  | Retrospective Cross-sectional | 89  | 40        | 44.94            |
| 2                                                                                                                                                                                                                                                                                                                                                                                                                                                                                                                                                                                                                                                                                                                                                                                   | Nesru M. (20)             | 2022 | SNNP        | Preterm and LBW*  | Retrospective Cross-sectional | 65  | 31        | 47.69            |
| 3                                                                                                                                                                                                                                                                                                                                                                                                                                                                                                                                                                                                                                                                                                                                                                                   | Getaneh FB et al. (16)    | 2022 | Addis Ababa | Preterm**         | Retrospective Cross-sectional | 84  | 75        | 89.29            |
| 4                                                                                                                                                                                                                                                                                                                                                                                                                                                                                                                                                                                                                                                                                                                                                                                   | Bereka et al. (14)        | 2021 | SNNP        | Preterm***        | Retrospective Cohort          | 12  | 10        | 83.33            |
| 5                                                                                                                                                                                                                                                                                                                                                                                                                                                                                                                                                                                                                                                                                                                                                                                   | Birhanu D et al. (21)     | 2023 | Addis Ababa | LBW****           | Retrospective Cohort          | 28  | 20        | 71.43            |
| 6                                                                                                                                                                                                                                                                                                                                                                                                                                                                                                                                                                                                                                                                                                                                                                                   | Girma et al. (22)         | 2023 | Tigray      | Preterm**         | Retrospective Cohort          | 12  | 9         | 75.00            |
| 7                                                                                                                                                                                                                                                                                                                                                                                                                                                                                                                                                                                                                                                                                                                                                                                   | Birhanu et al. (23)       | 2022 | Addis Ababa | Preterm**         | Prospective Cohort            | 87  | 65        | 74.71            |
| 8                                                                                                                                                                                                                                                                                                                                                                                                                                                                                                                                                                                                                                                                                                                                                                                   | Wondie et al. (24)        | 2023 | Amhara      | LBW****           | Retrospective Cohort          | 46  | 26        | 56.52            |
| 9                                                                                                                                                                                                                                                                                                                                                                                                                                                                                                                                                                                                                                                                                                                                                                                   | Woelile et al. (25)       | 2021 | Amhara      | LBW****           | Retrospective Cohort          | 42  | 35        | 83.33            |
| 10                                                                                                                                                                                                                                                                                                                                                                                                                                                                                                                                                                                                                                                                                                                                                                                  | Kebede BF et al. ((26)    | 2022 | Amhara      | LBW****           | Retrospective Cohort          | 11  | 9         | 81.82            |
| 11                                                                                                                                                                                                                                                                                                                                                                                                                                                                                                                                                                                                                                                                                                                                                                                  | Kokeb M and Desta T. (27) | 2016 | Amhara      | All neonates***** | Prospective Cross-sectional   | 13  | 6         | 46.15            |
| 12                                                                                                                                                                                                                                                                                                                                                                                                                                                                                                                                                                                                                                                                                                                                                                                  | Tamene A et al. (28)      | 2020 | Amhara      | Preterm**         | Retrospective Cross-sectional | 99  | 82        | 82.83            |
| <p><i>*Include neonates born &lt;37 weeks (including very preterm, and extremely preterm) AND neonates weighing &lt;2500gms (including very low birth weights, and extremely low birth weights)</i></p> <p><i>** Include neonates born &lt;37 weeks (including very preterm, and extremely preterm)</i></p> <p><i>***Include neonates born &lt;37weeks; but ≥28weeks of gestation</i></p> <p><i>****Include neonates weighing &lt;2500gms (including very low birth weights, and extremely low birth weights)</i></p> <p><i>*****Include all neonates regardless of other defining characteristics like birth weight, gestational age, etc.</i></p> <p><i>LBW = Low Birth Weight; NEC= Necrotizing Enterocolitis; SNNP= Southern Nations, Nationalities and People's Region</i></p> |                           |      |             |                   |                               |     |           |                  |
